# Supplementary material for: Ultrasensitive room temperature ppb-level NO2 gas sensors based on SnS2/rGO nanohybrids with P–N transition and optoelectronic visible light enhancement performance
Source: Royal Society of Chemistry journal article supplement (doi:10.1039/c9tc02436k), 2019-01-01

Supporting Information

Ultrasensitive ppb-level NO<sub>2</sub> gas sensors at room temperature based on SnS<sub>2</sub>/rGO nanohybrids with P-N transition property and optoelectronic visible light enhancement performance

Yifan Huang, Weicheng Jiao\*, Zhenming Chu, Guomin Ding, Meiling Yan, Xue Zhong and Rongguo Wang

National Key Laboratory of Science and Technology for National Defence on Advanced Composites in Special Environments, Harbin Institute of Technology, Harbin150086, China.

E-mail: xiaojiao458@163.com

**Figure S1 a)** PL spectroscopy of SnS<sub>2</sub>/rGO-5 obtained under an excitation wavelength of 532nm at room temperature and UV-vis of b) SnS<sub>2</sub>/rGO-1 and c) SnS<sub>2</sub>/rGO-5

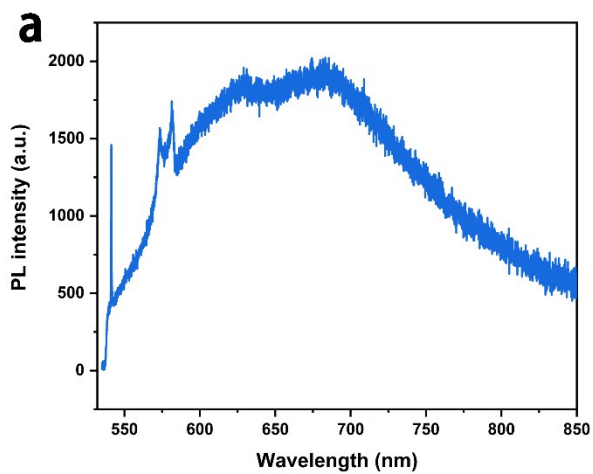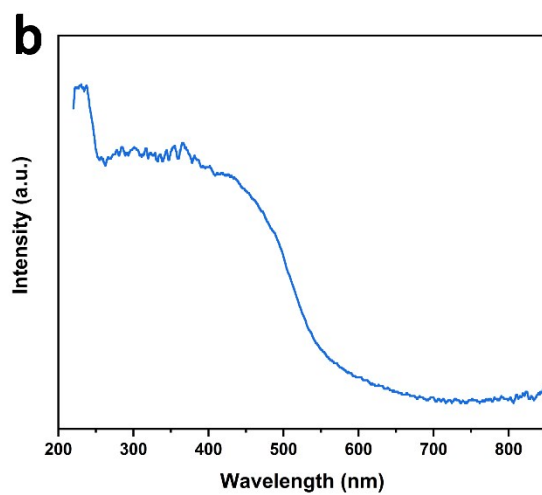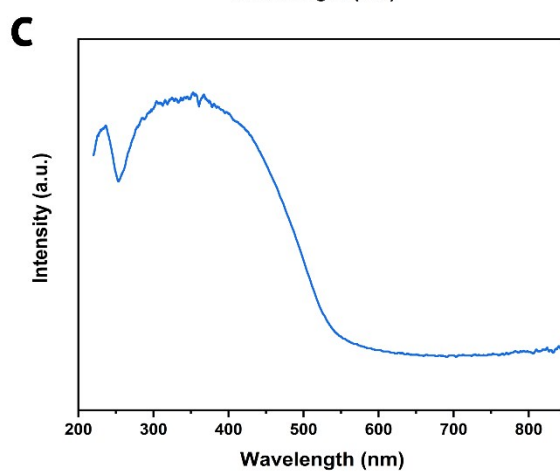

**Figure S2** The SEM image of a) pristine graphene and b) pristine SnS<sub>2</sub>

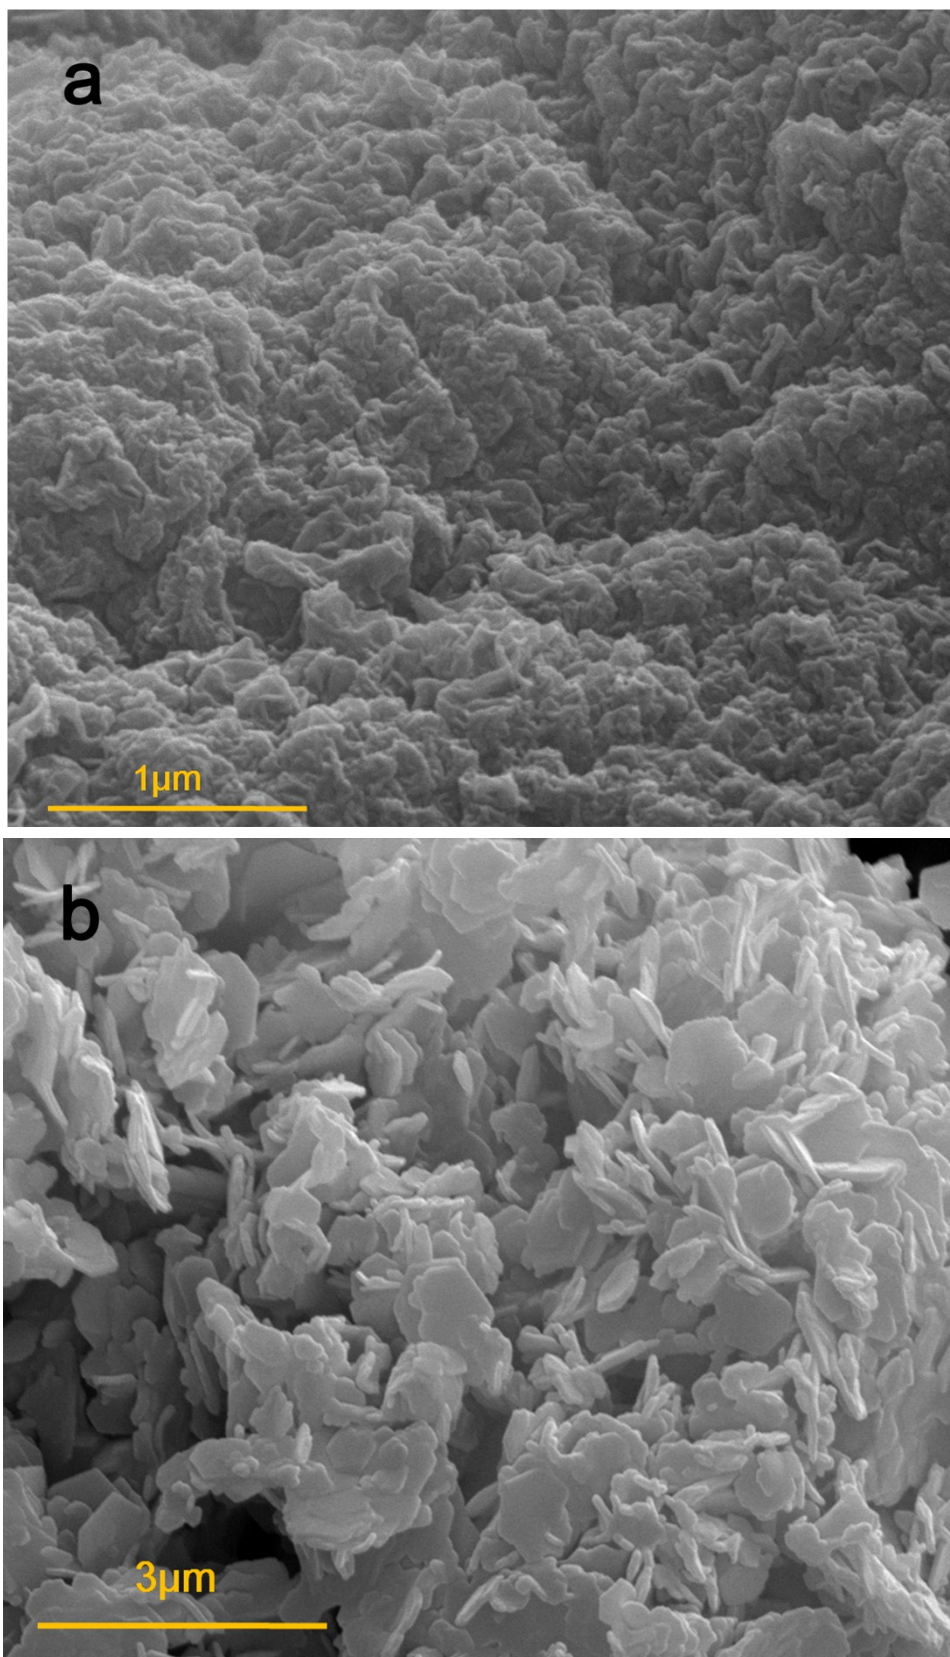

**Figure S3** The EDS of a) SnS<sub>2</sub>/rGO-1 and b) SnS<sub>2</sub>/rGO-5

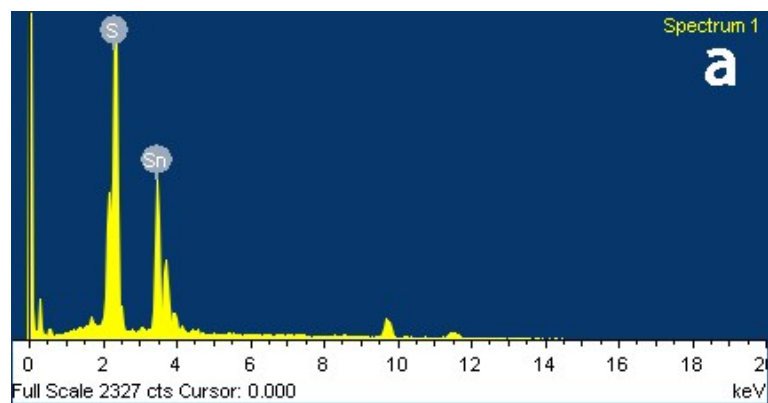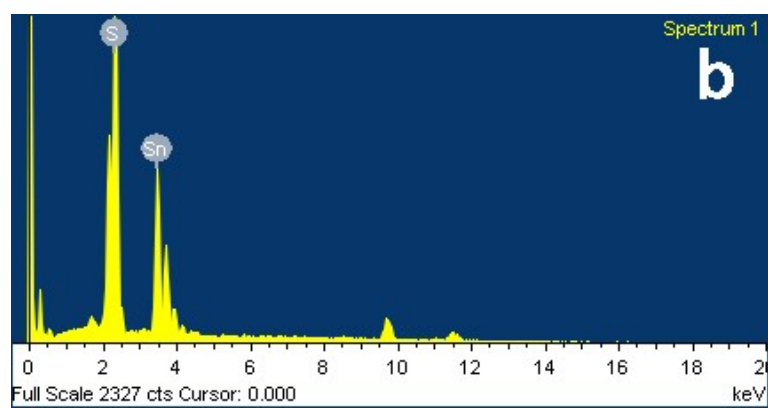

**Figure S4** Dynamic sensing performance of SnS<sub>2</sub>/rGO-2 and SnS<sub>2</sub>/rGO-3 towards NO<sub>2</sub> with concentrations (125 ppb, 250 ppb, 500 ppb, 1 ppm) at room temperature.

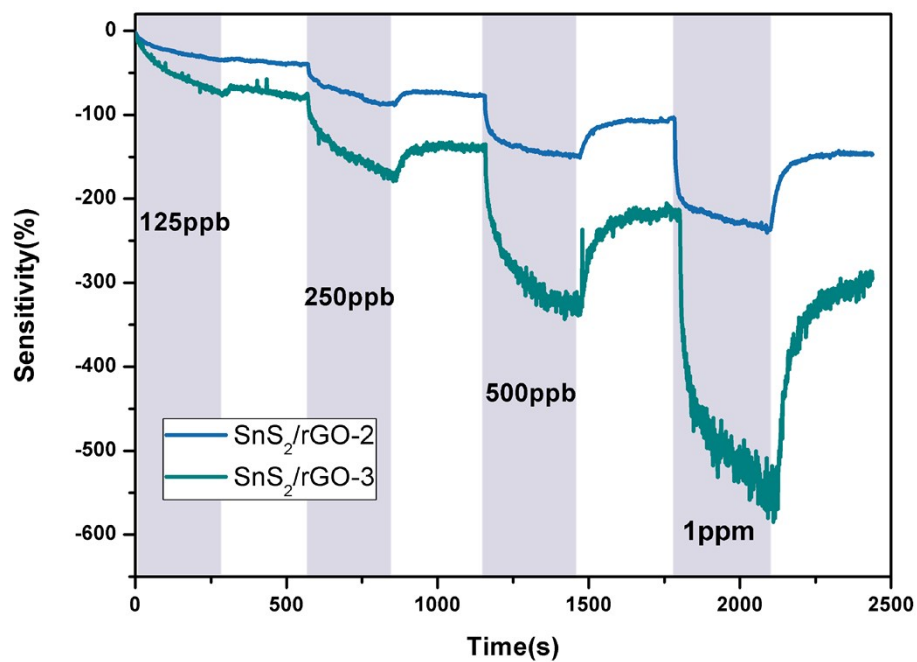

**Figure S5** Dynamic sensing performance of SnS<sub>2</sub>/rGO-10 and SnS<sub>2</sub>/rGO-20 towards NO<sub>2</sub> with concentrations (125 ppb, 250 ppb, 500 ppb, 1 ppm) at room temperature.

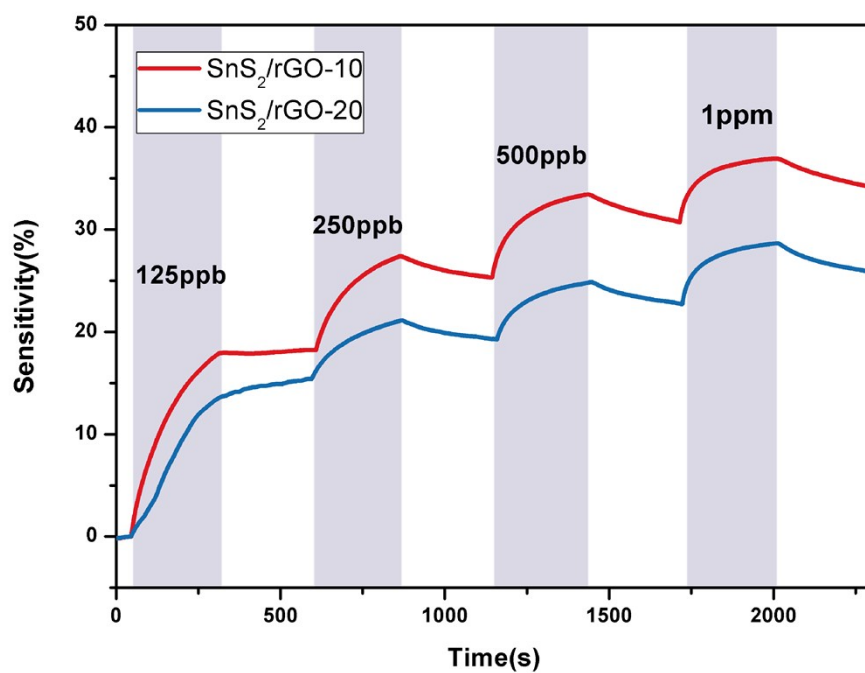

**Figure S6.** a) The response and recovery time vs NO<sub>2</sub> concentration of n-type sensors

b) The response time vs NO<sub>2</sub> concentration of p-type sensors

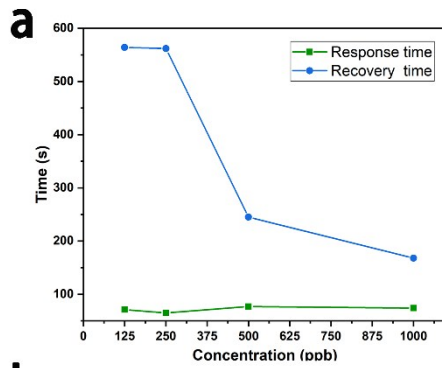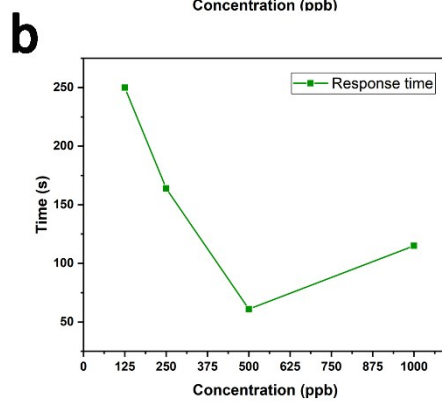

**Figure S7.** The fitting curves of the a) SnS<sub>2</sub>/rGO-2, b) SnS<sub>2</sub>/rGO-3, c) SnS<sub>2</sub>/rGO-10 and d) SnS<sub>2</sub>/rGO-5

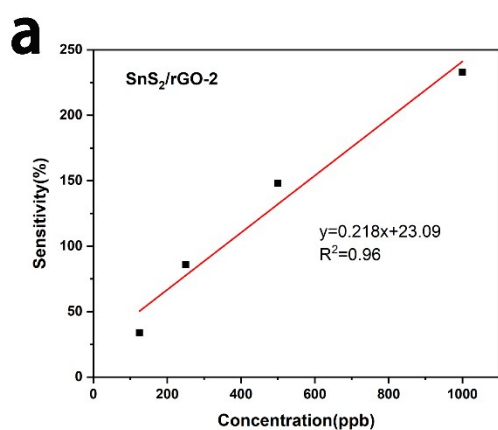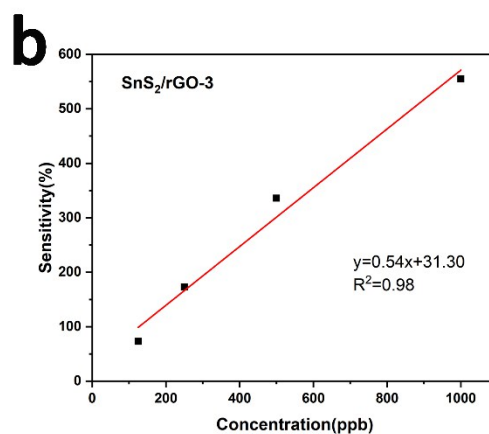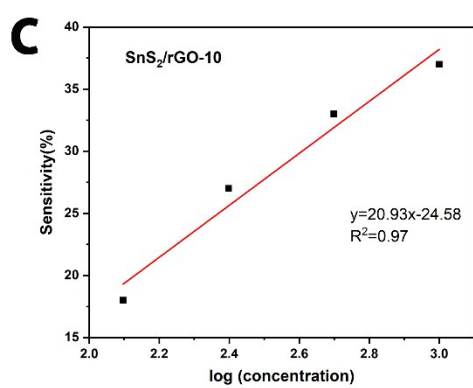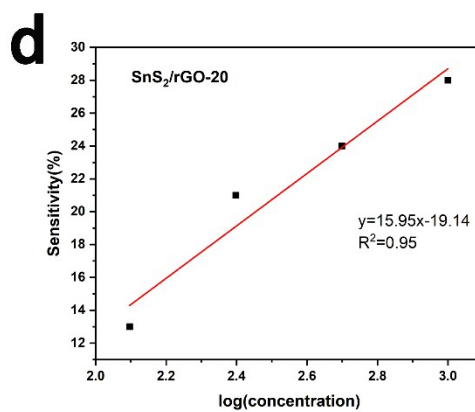



**Figure S8** The sensing behavior of a) SnS<sub>2</sub>/rGO-1 and b) SnS<sub>2</sub>/rGO-5 to 70% relative humidity under room temperature.

**a**

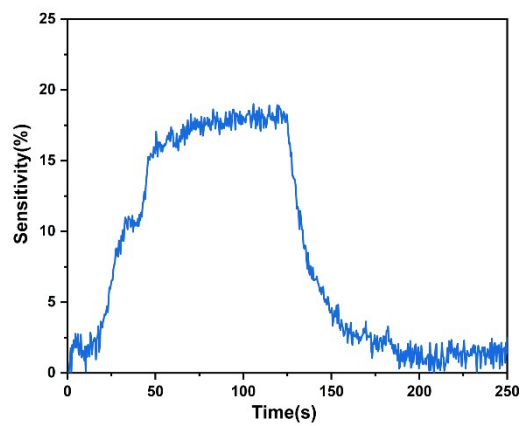

**b**

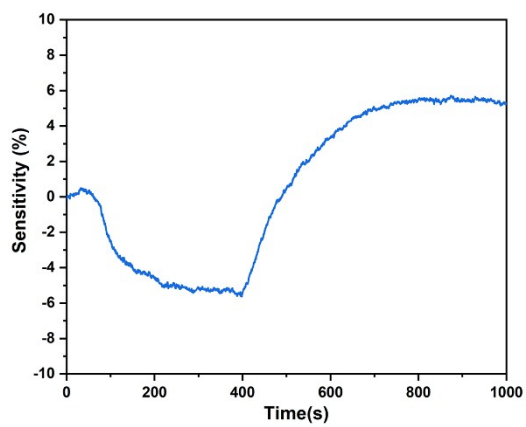

**Figure S9** The effect of light illumination on gas sensing properties of p-type SnS<sub>2</sub>/rGO sensors. a) The amplification factor of sensitivity under light illumination of different wavelengths and power density. b,) The relative response time under light illumination of different wavelengths and power density.

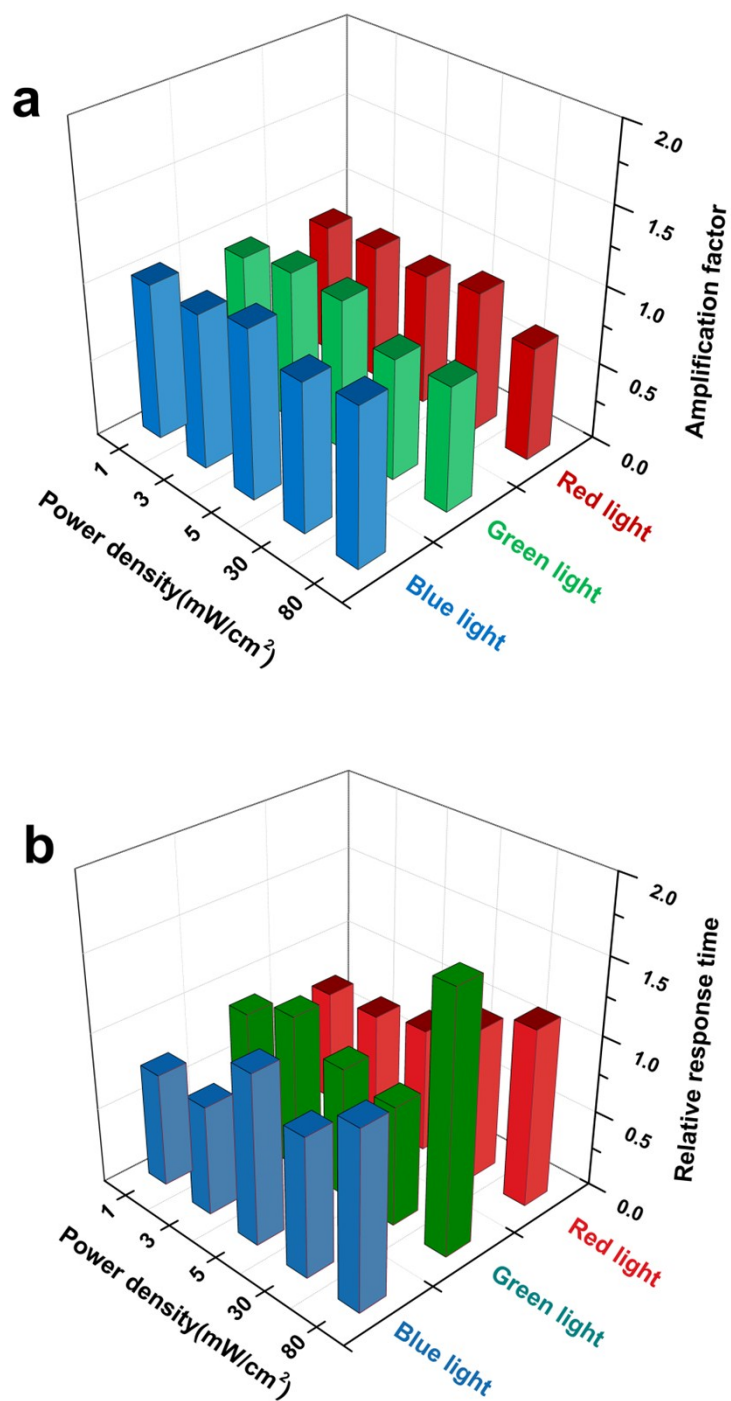

**Figure S10** Comparison the sensing behavior of pure SnS<sub>2</sub> and SnS<sub>2</sub>/rGO-1 under 2.5ppm concentration of NO<sub>2</sub> under 120°C.

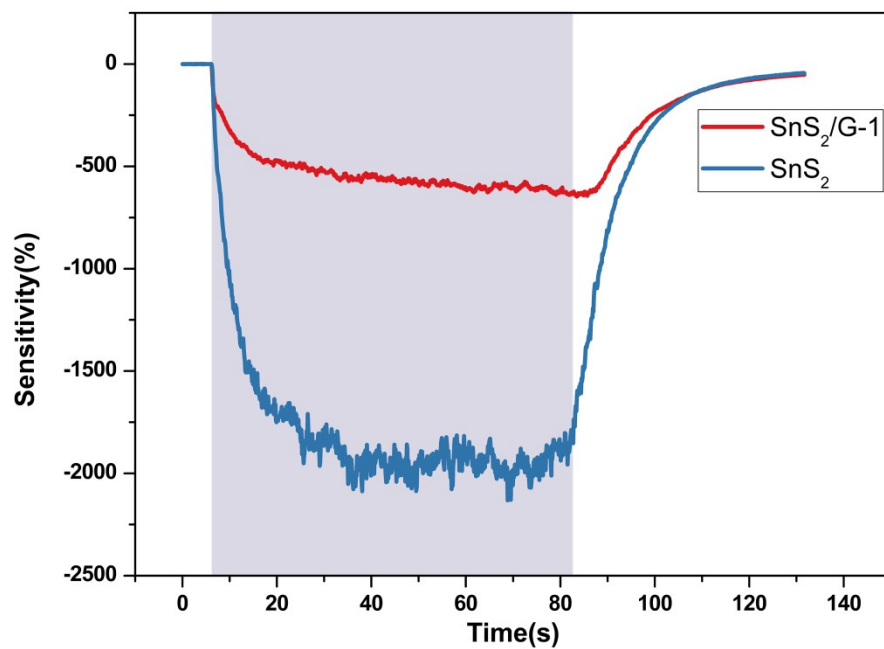

Supplement: c9tc02436k1.pdf [file c9tc02436k1.pdf]
